# Supplementary material
Source: Springer Nature journal article supplement (https://www.springermedizin.de/resource/supplementary/13058_2006_1640_MOESM1_ESM.pdf/9699584)
Supplement: MOESM1 [file 9699584]

**Table S1. Clinical information (array)**

| Patient ID | Age onset (year) | Recurrence [0=no, 1=local, 2=distant (+/-local)] | Recurrence code (distant metastasis or breast ca death) (0=no, 1=yes, 9=unknown) | Status (0=alive, 1=dead of breast ca., 2=dead of other cause, 3=emigrated, 9=unknown) | Recurrence free survival (months; first distant metastasis or breast cancer death) | Breast cancer survival (months) | Histological type | Tumor size (1=4-T1-T4, 9=unknown) | Node category (0=neg, 1=pos, 9=unknown) | Metastasis (0=no, 1=yes) | Grade (1-3) | TP53 mut (0=wt, 1=mut) | ER (0=neg, 1=pos, 9=unknown) | PR (0=neg, 1=pos, 9=unknown) | Adjuvant chemotherapy (0=no, 1=yes, 9=unknown) | Adjuvant radiation therapy (0=no, 1=yes, 9=unknown) | Adjuvant hormonal therapy (0=no, 1=yes, 9=unknown) | Gene expression subgroups (1=luminal A, 2=highly proliferating luminal, 3=normal-like, 4=basal-like, 5=ERBB2) |
|------------|------------------|--------------------------------------------------|----------------------------------------------------------------------------------|---------------------------------------------------------------------------------------|------------------------------------------------------------------------------------|---------------------------------|-------------------|-----------------------------------|-----------------------------------------|--------------------------|-------------|------------------------|------------------------------|------------------------------|------------------------------------------------|-----------------------------------------------------|----------------------------------------------------|---------------------------------------------------------------------------------------------------------------|
| ULL - 002  | 87.7             | 0                                                | 0                                                                                | 2                                                                                     | 9.8                                                                                | 9.8                             | Ductal            | 2                                 | 9                                       | 0                        | 2           | 0                      | 1                            | 1                            | 0                                              | 0                                                   | 1                                                  | 1                                                                                                             |
| ULL - 007  | 86.9             | 2                                                | 1                                                                                | 1                                                                                     | 27.7                                                                               | 50.5                            | Ductal            | 1                                 | 9                                       | 0                        | 2           | 1                      | 1                            | 1                            | 0                                              | 0                                                   | 0                                                  | 5                                                                                                             |
| ULL - 011  | 78.8             | 0                                                | 0                                                                                | 2                                                                                     | 145.5                                                                              | 145.5                           | Ductal            | 2                                 | 0                                       | 0                        | 2           | 0                      | 1                            | 0                            | 0                                              | 0                                                   | 0                                                  | 1                                                                                                             |
| ULL - 013  | 76.1             | 0                                                | 0                                                                                | 2                                                                                     | 70.4                                                                               | 70.4                            | Ductal            | 2                                 | 1                                       | 0                        | 1           | 0                      | 1                            | 1                            | 0                                              | 0                                                   | 1                                                  | 1                                                                                                             |
| ULL - 014  | 46.8             | 2                                                | 1                                                                                | 1                                                                                     | 19.4                                                                               | 46.5                            | Lobular           | 2                                 | 1                                       | 0                        | 2           | 0                      | 1                            | 1                            | 0                                              | 0                                                   | 1                                                  | 3                                                                                                             |
| ULL - 016  | 67.3             | 0                                                | 0                                                                                | 2                                                                                     | 131.1                                                                              | 131.1                           | Ductal            | 1                                 | 0                                       | 0                        | 3           | 0                      | 1                            | 1                            | 0                                              | 0                                                   | 0                                                  | 2                                                                                                             |
| ULL - 019  | 81.8             | 2                                                | 1                                                                                | 2                                                                                     | 48.7                                                                               | 72.8                            | Lobular           | 2                                 | 0                                       | 1                        | 2           | 0                      | 1                            | 1                            | 0                                              | 0                                                   | 0                                                  | 2                                                                                                             |
| ULL - 020  | 75.8             | 2                                                | 1                                                                                | 1                                                                                     | 87.8                                                                               | 93.9                            | Ductal            | 3                                 | 1                                       | 0                        | 2           | 0                      | 9                            | 9                            | 0                                              | 1                                                   | 1                                                  | 2                                                                                                             |
| ULL - 022  | 28.3             | 1                                                | 0                                                                                | 3                                                                                     | 146.1                                                                              | 146.1                           | Ductal            | 3                                 | 1                                       | 0                        | 2           | 0                      | 0                            | 0                            | 0                                              | 1                                                   | 1                                                  | 1                                                                                                             |
| ULL - 023  | 73.7             | 0                                                | 9                                                                                | 9                                                                                     | 164.6                                                                              | 164.6                           | Ductal            | 2                                 | 0                                       | 0                        | 3           | 1                      | 1                            | 1                            | 0                                              | 0                                                   | 0                                                  | 5                                                                                                             |
| ULL - 024  | 74.2             | 1                                                | 0                                                                                | 2                                                                                     | 144.4                                                                              | 144.4                           | Lobular           | 9                                 | 1                                       | 0                        | 2           | 0                      | 9                            | 9                            | 0                                              | 1                                                   | 0                                                  | 1                                                                                                             |
| ULL - 026  | 40.3             | 0                                                | 0                                                                                | 0                                                                                     | 173.0                                                                              | 173.0                           | Ductal            | 1                                 | 1                                       | 0                        | 3           | 0                      | 9                            | 9                            | 1                                              | 1                                                   | 0                                                  | 4                                                                                                             |
| ULL - 027  | 71.3             | 2                                                | 1                                                                                | 1                                                                                     | 18.5                                                                               | 27.0                            | Ductal            | 9                                 | 1                                       | 0                        | 2           | 0                      | 9                            | 9                            | 0                                              | 0                                                   | 1                                                  | 3                                                                                                             |
| ULL - 028  | 62.6             | 0                                                | 0                                                                                | 0                                                                                     | 177.9                                                                              | 177.9                           | Lobular           | 1                                 | 1                                       | 0                        | 2           | 0                      | 0                            | 1                            | 0                                              | 0                                                   | 0                                                  | 1                                                                                                             |
| ULL - 031  | 84.3             | 1                                                | 0                                                                                | 2                                                                                     | 70.2                                                                               | 70.2                            | Lobular           | 2                                 | 9                                       | 0                        | 2           | 0                      | 0                            | 1                            | 0                                              | 0                                                   | 0                                                  | 3                                                                                                             |
| ULL - 036  | 70.6             | 1                                                | 0                                                                                | 2                                                                                     | 117.9                                                                              | 117.9                           | Lobular           | 1                                 | 0                                       | 0                        | 2           | 0                      | 1                            | 1                            | 0                                              | 9                                                   | 0                                                  | 1                                                                                                             |
| ULL - 037  | 78.2             | 2                                                | 1                                                                                | 1                                                                                     | 50.8                                                                               | 83.4                            | Ductal            | 2                                 | 0                                       | 0                        | 2           | 0                      | 1                            | 1                            | 0                                              | 0                                                   | 0                                                  | 2                                                                                                             |
| ULL - 038  | 74.8             | 2                                                | 1                                                                                | 1                                                                                     | 61.1                                                                               | 82.2                            | Ductal            | 1                                 | 0                                       | 0                        | 3           | 1                      | 1                            | 1                            | 0                                              | 1                                                   | 0                                                  | 2                                                                                                             |
| ULL - 044  | 81.9             | 2                                                | 1                                                                                | 1                                                                                     | 22.9                                                                               | 71.5                            | Ductal            | 1                                 | 1                                       | 0                        | 2           | 0                      | 1                            | 1                            | 0                                              | 0                                                   | 0                                                  | 2                                                                                                             |
| ULL - 046  | 41.2             | 0                                                | 0                                                                                | 0                                                                                     | 176.5                                                                              | 176.5                           | Lobular           | 2                                 | 1                                       | 0                        | 3           | 0                      | 1                            | 1                            | 1                                              | 0                                                   | 1                                                  | 3                                                                                                             |
| ULL - 048  | 61.0             | 2                                                | 1                                                                                | 0                                                                                     | 109.5                                                                              | 172.8                           | Ductal            | 2                                 | 1                                       | 0                        | 2           | 0                      | 1                            | 1                            | 0                                              | 1                                                   | 1                                                  | 1                                                                                                             |
| ULL - 053  | 62.4             | 0                                                | 0                                                                                | 2                                                                                     | 13.6                                                                               | 13.6                            | Ductal            | 2                                 | 1                                       | 0                        | 3           | 0                      | 1                            | 1                            | 0                                              | 1                                                   | 1                                                  | 5                                                                                                             |
| ULL - 055  | 80.9             | 0                                                | 9                                                                                | 9                                                                                     | 129.8                                                                              | 129.8                           | Tubulolobular     | 1                                 | 9                                       | 0                        | 1           | 1                      | 1                            | 1                            | 0                                              | 0                                                   | 0                                                  | 1                                                                                                             |
| ULL - 056  | 76.6             | 2                                                | 1                                                                                | 1                                                                                     | 11.2                                                                               | 16.1                            | Ductal            | 2                                 | 0                                       | 0                        | 3           | 1                      | 0                            | 1                            | 0                                              | 0                                                   | 0                                                  | 5                                                                                                             |
| ULL - 057  | 47.5             | 2                                                | 1                                                                                | 1                                                                                     | 7.3                                                                                | 7.7                             | Ductal            | 2                                 | 9                                       | 0                        | 2           | 1                      | 0                            | 1                            | 1                                              | 1                                                   | 0                                                  | 4                                                                                                             |
| ULL - 060  | 74.7             | 0                                                | 0                                                                                | 2                                                                                     | 145.5                                                                              | 145.5                           | Mucinous          | 2                                 | 0                                       | 0                        | 2           | 0                      | 1                            | 1                            | 0                                              | 0                                                   | 0                                                  | 1                                                                                                             |
| ULL - 062  | 62.1             | 0                                                | 0                                                                                | 0                                                                                     | 160.9                                                                              | 160.9                           | Lobular           | 2                                 | 0                                       | 0                        | 2           | 0                      | 1                            | 1                            | 0                                              | 1                                                   | 0                                                  | 3                                                                                                             |
| ULL - 063  | 80.8             | 2                                                | 1                                                                                | 1                                                                                     | 6.6                                                                                | 7.1                             | Mucinous          | 2                                 | 9                                       | 0                        | 1           | 0                      | 1                            | 0                            | 0                                              | 0                                                   | 0                                                  | 1                                                                                                             |
| ULL - 065  | 59.5             | 0                                                | 0                                                                                | 0                                                                                     | 167.6                                                                              | 167.6                           | Ductal            | 2                                 | 1                                       | 0                        | 3           | 1                      | 0                            | 1                            | 1                                              | 1                                                   | 1                                                  | 4                                                                                                             |
| ULL - 066  | 78.4             | 2                                                | 1                                                                                | 2                                                                                     | 5.2                                                                                | 19.7                            | Ductal            | 2                                 | 1                                       | 0                        | 2           | 0                      | 1                            | 1                            | 0                                              | 0                                                   | 0                                                  | 2                                                                                                             |
| ULL - 067  | 62.2             | 2                                                | 1                                                                                | 1                                                                                     | 18.2                                                                               | 25.0                            | Ductal            | 2                                 | 0                                       | 0                        | 2           | 0                      | 1                            | 0                            | 0                                              | 0                                                   | 0                                                  | 3                                                                                                             |
| ULL - 069  | 56.1             | 2                                                | 1                                                                                | 1                                                                                     | 5.5                                                                                | 20.1                            | Lobular           | 2                                 | 0                                       | 0                        | 2           | 1                      | 0                            | 1                            | 0                                              | 0                                                   | 0                                                  | 4                                                                                                             |
| ULL - 071  | 48.4             | 0                                                | 0                                                                                | 0                                                                                     | 167.7                                                                              | 167.7                           | Ductal            | 2                                 | 0                                       | 0                        | 3           | 1                      | 0                            | 1                            | 0                                              | 0                                                   | 0                                                  | 5                                                                                                             |
| ULL - 072  | 58.7             | 2                                                | 1                                                                                | 1                                                                                     | 42.1                                                                               | 65.3                            | Lobular           | 2                                 | 9                                       | 0                        | 2           | 0                      | 0                            | 1                            | 0                                              | 0                                                   | 1                                                  | 2                                                                                                             |
| ULL - 074  | 43.2             | 0                                                | 0                                                                                | 0                                                                                     | 163.5                                                                              | 163.5                           | Ductal            | 2                                 | 1                                       | 0                        | 2           | 0                      | 1                            | 1                            | 1                                              | 1                                                   | 1                                                  | 1                                                                                                             |
| ULL - 075  | 28.2             | 0                                                | 0                                                                                | 0                                                                                     | 163.4                                                                              | 163.4                           | Ductal            | 2                                 | 0                                       | 0                        | 2           | 0                      | 0                            | 0                            | 0                                              | 0                                                   | 0                                                  | 4                                                                                                             |
| ULL - 079  | 86.1             | 0                                                | 0                                                                                | 2                                                                                     | 95.0                                                                               | 95.0                            | Mucinous          | 2                                 | 9                                       | 0                        | 2           | 0                      | 1                            | 0                            | 0                                              | 0                                                   | 0                                                  | 1                                                                                                             |
| ULL - 080  | 64.5             | 2                                                | 1                                                                                | 1                                                                                     | 12.1                                                                               | 104.9                           | Ductal            | 2                                 | 1                                       | 0                        | 2           | 1                      | 0                            | 0                            | 0                                              | 0                                                   | 0                                                  | 4                                                                                                             |
| ULL - 083  | 58.3             | 0                                                | 0                                                                                | 3                                                                                     | 21.2                                                                               | 21.2                            | Ductal            | 2                                 | 1                                       | 0                        | 3           | 1                      | 0                            | 1                            | 1                                              | 1                                                   | 0                                                  | 5                                                                                                             |
| ULL - 085  | 59.4             | 2                                                | 1                                                                                | 1                                                                                     | 29.5                                                                               | 32.0                            | Ductal            | 4                                 | 1                                       | 0                        | 2           | 0                      | 0                            | 1                            | 9                                              | 1                                                   | 1                                                  | 2                                                                                                             |
| ULL - 087  | 47.4             | 0                                                | 0                                                                                | 0                                                                                     | 161.0                                                                              | 161.0                           | Ductal            | 1                                 | 0                                       | 0                        | 3           | 0                      | 0                            | 1                            | 0                                              | 0                                                   | 0                                                  | 5                                                                                                             |
| ULL - 088  | 70.9             | 0                                                | 0                                                                                | 0                                                                                     | 161.1                                                                              | 161.1                           | Lobular           | 2                                 | 0                                       | 0                        | 2           | 0                      | 0                            | 0                            | 0                                              | 9                                                   | 0                                                  | 3                                                                                                             |
| ULL - 096  | 57.0             | 0                                                | 0                                                                                | 0                                                                                     | 169.8                                                                              | 169.8                           | Ductal            | 2                                 | 0                                       | 0                        | 3           | 1                      | 0                            | 0                            | 1                                              | 9                                                   | 0                                                  | 5                                                                                                             |
| ULL - 097  | 82.4             | 0                                                | 0                                                                                | 2                                                                                     | 5.8                                                                                | 5.8                             | Lobular           | 2                                 | 9                                       | 0                        | 2           | 0                      | 1                            | 1                            | 0                                              | 0                                                   | 0                                                  | 3                                                                                                             |
| ULL - 099  | 55.1             | 0                                                | 9                                                                                | 9                                                                                     | 110.8                                                                              | 110.8                           | Ductal            | 2                                 | 1                                       | 0                        | 3           | 1                      | 0                            | 1                            | 0                                              | 1                                                   | 1                                                  | 4                                                                                                             |
| ULL - 101  | 81.0             | 2                                                | 1                                                                                | 1                                                                                     | 15.3                                                                               | 18.9                            | Ductal            | 4                                 | 0                                       | 0                        | 3           | 1                      | 0                            | 1                            | 0                                              | 0                                                   | 0                                                  | 5                                                                                                             |
| ULL - 105  | 73.7             | 2                                                | 1                                                                                | 1                                                                                     | 55.8                                                                               | 95.9                            | Lobular           | 3                                 | 1                                       | 0                        | 2           | 0                      | 1                            | 1                            | 0                                              | 1                                                   | 1                                                  | 3                                                                                                             |
| ULL - 107  | 71.9             | 0                                                | 0                                                                                | 2                                                                                     | 122.1                                                                              | 122.1                           | Tubulolobular     | 1                                 | 1                                       | 0                        | 1           | 0                      | 1                            | 1                            | 0                                              | 0                                                   | 0                                                  | 1                                                                                                             |
| ULL - 111  | 55.3             | 0                                                | 0                                                                                | 0                                                                                     | 171.2                                                                              | 171.2                           | Lobular           | 1                                 | 1                                       | 0                        | 2           | 0                      | 1                            | 1                            | 0                                              | 1                                                   | 1                                                  | 3                                                                                                             |
| ULL - 112  | 46.6             | 0                                                | 0                                                                                | 0                                                                                     | 161.9                                                                              | 161.9                           | Lobular           | 3                                 | 1                                       | 0                        | 1           | 0                      | 1                            | 1                            | 1                                              | 0                                                   | 1                                                  | 1                                                                                                             |
| ULL - 113  | 65.6             | 2                                                | 1                                                                                | 1                                                                                     | 28.3                                                                               | 53.9                            | Ductal            | 2                                 | 0                                       | 0                        | 2           | 1                      | 1                            | 1                            | 0                                              | 0                                                   | 0                                                  | 2                                                                                                             |
| ULL - 122  | 72.5             | 0                                                | 0                                                                                | 0                                                                                     | 160.6                                                                              | 160.6                           | Ductal            | 1                                 | 0                                       | 0                        | 2           | 0                      | 1                            | 1                            | 0                                              | 0                                                   | 0                                                  | 1                                                                                                             |
| ULL - 123  | 75.2             | 1                                                | 0                                                                                | 2                                                                                     | 40.0                                                                               | 40.0                            | Other             | 4                                 | 0                                       | 0                        | 3           | 0                      | 9                            | 0                            | 9                                              | 0                                                   | 9                                                  | 3                                                                                                             |
| ULL - 132  | 69.5             | 0                                                | 0                                                                                | 2                                                                                     | 83.0                                                                               | 83.0                            | Ductal            | 9                                 | 0                                       | 0                        | 2           | 0                      | 0                            | 0                            | 0                                              | 0                                                   | 0                                                  | 2                                                                                                             |
| ULL - 134  | 60.3             | 0                                                | 0                                                                                | 0                                                                                     | 171.5                                                                              | 171.5                           | Ductal            | 2                                 | 0                                       | 0                        | 2           | 0                      | 1                            | 1                            | 0                                              | 0                                                   | 0                                                  | 1                                                                                                             |
| ULL - 135  | 73.3             | 0                                                | 0                                                                                | 0                                                                                     | 167.3                                                                              | 167.3                           | Ductal            | 1                                 | 0                                       | 0                        | 2           | 0                      | 1                            | 1                            | 0                                              | 1                                                   | 0                                                  | 3                                                                                                             |

**Table S1. Clinical information (array)**

| Patient ID | Age onset (year) | Recurrence [0=no, 1=local, 2=distant (+/-local)] | Recurrence code (distant metastasis or breast ca death) (0=no, 1=yes, 9=unknown) | Status (0=alive, 1=dead of breast ca., 2=dead of other cause, 3=emigrated, 9=unknown) | Recurrence free survival (months; first distant metastasis or breast cancer death) | Breast cancer survival (months) | Histological type | Tumor size (1=4-T1-T4, 9=unknown) | Node category (0=neg, 1=pos, 9=unknown) | Metastasis (0=no, 1=yes) | Grade (1-3) | TP53 mut (0=wt, 1=mut) | ER (0=neg, 1=pos, 9=unknown) | PR (0=neg, 1=pos, 9=unknown) | Adjuvant chemotherapy (0=no, 1=yes, 9=unknown) | Adjuvant radiation therapy (0=no, 1=yes, 9=unknown) | Adjuvant hormonal therapy (0=no, 1=yes, 9=unknown) | Gene expression subgroups (1=luminal A, 2=highly proliferating luminal, 3=normal-like, 4=basal-like, 5=ERBB2) |
|------------|------------------|--------------------------------------------------|----------------------------------------------------------------------------------|---------------------------------------------------------------------------------------|------------------------------------------------------------------------------------|---------------------------------|-------------------|-----------------------------------|-----------------------------------------|--------------------------|-------------|------------------------|------------------------------|------------------------------|------------------------------------------------|-----------------------------------------------------|----------------------------------------------------|---------------------------------------------------------------------------------------------------------------|
| ULL - 136  | 67.4             | 0                                                | 0                                                                                | 2                                                                                     | 124.8                                                                              | 124.8                           | Lobular           | 2                                 | 1                                       | 0                        | 2           | 0                      | 0                            | 1                            | 1                                              | 0                                                   | 0                                                  | 3                                                                                                             |
| ULL - 138  | 74.3             | 2                                                | 1                                                                                | 1                                                                                     | 21.8                                                                               | 36.4                            | Lobular           | 1                                 | 0                                       | 0                        | 2           | 0                      | 1                            | 0                            | 0                                              | 0                                                   | 0                                                  | 3                                                                                                             |
| ULL - 139  | 48.1             | 2                                                | 1                                                                                | 1                                                                                     | 1.9                                                                                | 10.7                            | Ductal            | 2                                 | 0                                       | 0                        | 3           | 1                      | 0                            | 0                            | 0                                              | 0                                                   | 4                                                  |                                                                                                               |
| ULL - 143  | 48.0             | 2                                                | 1                                                                                | 1                                                                                     | 46.6                                                                               | 103.0                           | Ductal            | 2                                 | 0                                       | 0                        | 2           | 0                      | 1                            | 1                            | 0                                              | 0                                                   | 1                                                  |                                                                                                               |
| ULL - 144  | 61.9             | 0                                                | 0                                                                                | 0                                                                                     | 159.0                                                                              | 159.0                           | Ductal            | 1                                 | 1                                       | 0                        | 2           | 0                      | 1                            | 1                            | 0                                              | 0                                                   | 1                                                  |                                                                                                               |
| ULL - 150  | 63.7             | 0                                                | 0                                                                                | 0                                                                                     | 157.8                                                                              | 157.8                           | Ductal            | 1                                 | 1                                       | 0                        | 2           | 0                      | 1                            | 1                            | 0                                              | 0                                                   | 1                                                  |                                                                                                               |
| ULL - 165  | 76.0             | 2                                                | 1                                                                                | 1                                                                                     | 53.9                                                                               | 60.2                            | Ductal            | 4                                 | 1                                       | 0                        | 3           | 0                      | 1                            | 1                            | 0                                              | 1                                                   | 2                                                  |                                                                                                               |
| ULL - 167  | 74.8             | 1                                                | 1                                                                                | 1                                                                                     | 10.1                                                                               | 10.1                            | Ductal            | 2                                 | 1                                       | 0                        | 3           | 1                      | 0                            | 0                            | 0                                              | 1                                                   | 4                                                  |                                                                                                               |
| ULL - 168  | 78.4             | 2                                                | 1                                                                                | 2                                                                                     | 9.6                                                                                | 12.9                            | Lobular           | 2                                 | 9                                       | 0                        | 2           | 0                      | 0                            | 0                            | 0                                              | 0                                                   | 1                                                  |                                                                                                               |
| ULL - 169  | 51.1             | 2                                                | 1                                                                                | 1                                                                                     | 4.4                                                                                | 12.3                            | Ductal            | 3                                 | 1                                       | 0                        | 2           | 0                      | 0                            | 0                            | 1                                              | 1                                                   | 5                                                  |                                                                                                               |
| ULL - 176  | 46.4             | 0                                                | 0                                                                                | 0                                                                                     | 154.8                                                                              | 154.8                           | Lobular           | 2                                 | 1                                       | 0                        | 1           | 0                      | 0                            | 0                            | 1                                              | 0                                                   | 3                                                  |                                                                                                               |
| ULL - 177  | 46.8             | 2                                                | 1                                                                                | 1                                                                                     | 63.9                                                                               | 79.8                            | Ductal            | 3                                 | 0                                       | 0                        | 3           | 1                      | 0                            | 0                            | 0                                              | 0                                                   | 4                                                  |                                                                                                               |
| ULL - 181  | 50.2             | 2                                                | 1                                                                                | 1                                                                                     | 1.2                                                                                | 78.2                            | Lobular           | 2                                 | 9                                       | 1                        | 2           | 0                      | 1                            | 1                            | 0                                              | 0                                                   | 1                                                  |                                                                                                               |
| ULL - 183  | 73.1             | 0                                                | 0                                                                                | 2                                                                                     | 77.3                                                                               | 77.3                            | Ductal            | 1                                 | 0                                       | 0                        | 2           | 0                      | 9                            | 0                            | 0                                              | 0                                                   | 3                                                  |                                                                                                               |
| ULL - 184  | 70.9             | 0                                                | 0                                                                                | 0                                                                                     | 153.9                                                                              | 153.9                           | Ductal            | 1                                 | 1                                       | 0                        | 3           | 0                      | 9                            | 0                            | 0                                              | 1                                                   | 2                                                  |                                                                                                               |
| ULL - 188  | 58.1             | 0                                                | 0                                                                                | 0                                                                                     | 154.3                                                                              | 154.3                           | Ductal            | 2                                 | 1                                       | 0                        | 3           | 1                      | 0                            | 0                            | 0                                              | 0                                                   | 4                                                  |                                                                                                               |
| ULL - 190  | 62.5             | 2                                                | 1                                                                                | 1                                                                                     | 20.6                                                                               | 23.0                            | Lobular           | 3                                 | 1                                       | 0                        | 2           | 0                      | 9                            | 0                            | 0                                              | 1                                                   | 3                                                  |                                                                                                               |
| ULL - 199  | 54.2             | 0                                                | 0                                                                                | 0                                                                                     | 153.5                                                                              | 153.5                           | DCIS              | 1                                 | 9                                       | 0                        | 2           | 0                      | 1                            | 0                            | 0                                              | 0                                                   | 3                                                  |                                                                                                               |
| ULL - 201  | 79.3             | 2                                                | 1                                                                                | 1                                                                                     | 24.3                                                                               | 63.3                            | Ductal            | 2                                 | 0                                       | 0                        | 2           | 0                      | 1                            | 1                            | 0                                              | 0                                                   | 1                                                  |                                                                                                               |
| ULL - 202  | 72.8             | 2                                                | 1                                                                                | 1                                                                                     | 3.7                                                                                | 10.9                            | Ductal            | 4                                 | 1                                       | 0                        | 2           | 1                      | 0                            | 0                            | 1                                              | 0                                                   | 4                                                  |                                                                                                               |
| ULL - 214  | 43.8             | 0                                                | 0                                                                                | 0                                                                                     | 150.7                                                                              | 150.7                           | Ductal            | 1                                 | 0                                       | 0                        | 2           | 0                      | 1                            | 1                            | 0                                              | 0                                                   | 1                                                  |                                                                                                               |
| ULL - 216  | 67.2             | 0                                                | 0                                                                                | 2                                                                                     | 26.4                                                                               | 26.4                            | Ductal            | 2                                 | 0                                       | 0                        | 2           | 0                      | 1                            | 1                            | 0                                              | 9                                                   | 0                                                  |                                                                                                               |
| ULL - 222  | 75.2             | 0                                                | 0                                                                                | 0                                                                                     | 148.9                                                                              | 148.9                           | Lobular           | 3                                 | 1                                       | 0                        | 2           | 0                      | 1                            | 1                            | 0                                              | 1                                                   | 1                                                  |                                                                                                               |
| ULL - 230  | 64.0             | 2                                                | 1                                                                                | 1                                                                                     | 43.4                                                                               | 94.3                            | Ductal            | 2                                 | 0                                       | 0                        | 2           | 0                      | 1                            | 1                            | 0                                              | 0                                                   | 0                                                  |                                                                                                               |
